# Supplementary material for: Deconditioning as main mechanism of impaired exercise response in COVID-19 survivors
Source: PubMed Central journal article supplement — Eur Respir J. 2021 Aug 26;58(2):2100870. doi: 10.1183/13993003.00870-2021 (PMC8082950; doi:10.1183/13993003.00870-2021), 2021-08-26

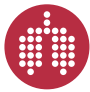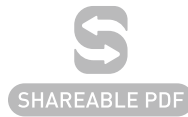

# Deconditioning as main mechanism of impaired exercise response in COVID-19 survivors

Rocco Francesco Rinaldo <sup>1</sup>, Michele Mondoni<sup>1</sup>, Elena Maria Parazzini<sup>1</sup>, Federica Pitari <sup>1</sup>, Elena Brambilla<sup>1</sup>, Simone Luraschi<sup>1</sup>, Maurizio Balbi<sup>2</sup>, Giuseppe Francesco Sferrazza Papa<sup>3,4</sup>, Giovanni Sotgiu <sup>5</sup>, Marco Guazzi<sup>6</sup>, Fabiano Di Marco <sup>7</sup> and Stefano Centanni<sup>1</sup>

<sup>1</sup>Dept of Health Sciences, Respiratory Unit, ASST Santi Paolo e Carlo, San Paolo Hospital, University of Milan, Milan, Italy. <sup>2</sup>Radiologic Sciences, Dept of Medicine and Surgery, University of Parma, Parma, Italy. <sup>3</sup>Dipartimento di Scienze Neuroriabilitative, Casa di Cura del Policlinico, Milan, Italy. <sup>4</sup>Dept of Health Sciences, University of Milan, Milan, Italy. <sup>5</sup>Clinical Epidemiology and Medical Statistics Unit, Dept of Medical, Surgical and Experimental Medicine, University of Sassari, Sassari, Italy. <sup>6</sup>Dept of Health Sciences, Cardiology Unit, ASST Santi Paolo e Carlo, San Paolo Hospital, University of Milan, Milan, Italy. <sup>7</sup>Dept of Health Sciences, Respiratory Unit, ASST Papa Giovanni XXIII Hospital, University of Milan, Bergamo, Italy.

Rocco Francesco Rinaldo ([rocco.rinaldo@unimi.it](mailto:rocco.rinaldo@unimi.it))

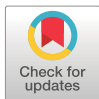

Shareable abstract (@ERSpublications)

**CPET reveals only a mild impairment of exercise capacity, with preserved ventilatory and gas exchange response at 3 months follow-up in COVID-19 survivors, due to deconditioning**

<https://bit.ly/3sI8e0Y>

**Cite this article as:** Rinaldo RF, Mondoni M, Parazzini EM, *et al.* Deconditioning as main mechanism of impaired exercise response in COVID-19 survivors. *Eur Respir J* 2021; 58: 2100870 [DOI: 10.1183/13993003.00870-2021].

This single-page version can be shared freely online.

Copyright ©The authors 2021

This version is distributed under the terms of the Creative Commons Attribution Non-Commercial Licence 4.0. For commercial reproduction rights and permissions contact [permissions@ersnet.org](mailto:permissions@ersnet.org)

This article has an editorial commentary:  
<https://doi.org/10.1183/13993003.01763-2021>

Received: 14 Jan 2021  
Accepted: 17 April 2021

*To the Editor:*

SARS-CoV-2 (severe acute respiratory syndrome coronavirus 2) and the related coronavirus disease 2019 (COVID-19) hit Europe in February 2020 [1], raising issues on acute phase management and, later on, the management of its long-term sequelae. Cardiopulmonary exercise testing (CPET), which is the gold standard for the evaluation of exercise capacity, is included in the list of examinations of the European Respiratory Society/American Thoracic Society task force for the follow-up of COVID-19 patients [2]. However, it is not performed in every clinical centre, as it requires specific technical skills. The objective of this observational, prospective study was to evaluate the sequelae of COVID-19 by assessing exercise performance during incremental CPET.

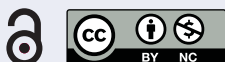

Supplement: ERJ-00870-2021.Shareable.pdf [file ERJ-00870-2021.Shareable.pdf]
